# Supplementary material for: Antibacterial and photochemical properties of cellulose nanofiber–titania nanocomposites loaded with two different types of antibiotic medicines
Source: Royal Society of Chemistry journal article supplement (doi:10.1039/c5tb01382h), 2015-01-01
Supplement: c5tb01382h1.pdf [file c5tb01382h1.pdf]

*Supporting Information Available*

## **Antibacterial and photochemical properties of cellulose nanofibers–titania nanocomposites loaded with two different types of antibiotic medicines**

O.L. Galkina<sup>ab</sup>, K. Öneby<sup>b</sup>, P. Huang<sup>d</sup>, V.K. Ivanov<sup>e,f</sup>, A.V. Agafonov<sup>a,f</sup>, G.A. Seisenbaeva<sup>b,c</sup>, and V.G. Kessler<sup>b,c</sup>

<sup>a</sup>Institute of Solution Chemistry of the Russian Academy of Sciences, Akademicheskaya St.,1, Ivanovo, Russia, e-mails: [olga.galkina@slu.se](mailto:olga.galkina@slu.se), [ava@isc-ras.ru](mailto:ava@isc-ras.ru);

<sup>b</sup>Department of Chemistry and Biotechnology, Swedish University of Agricultural Sciences, 750 07 Uppsala, Sweden, e-mails: [gulaim.seisenbaeva@slu.se](mailto:gulaim.seisenbaeva@slu.se), [vadim.kessler@slu.se](mailto:vadim.kessler@slu.se)

<sup>c</sup>CaptiGel AB, Virdings allé 32B, 75450 Uppsala, Sweden.

<sup>d</sup> Molecular Biomimetics, Department of Chemistry – Ångström, Uppsala University, Box 523, SE 751 20, Uppsala, Sweden

<sup>e</sup> Kurnakov Institute of General and Inorganic Chemistry, Leninskiiprosp. 31, Moscow, Russia, e-mail: [van@igic.ras.ru](mailto:van@igic.ras.ru)

<sup>f</sup> National Research Tomsk State University, 36 Lenin Av., Tomsk, 634050, Russia.

### **Surface modification**

Cellulose nanofibers surface were modified by Phosphomycin and Tetracycline in amounts calculated to achieve uniform, single layer coverage. The surface of titania was estimated using simple mathematical model where the particles are spherical, uniform and homogenous. According to our assumption that drug bonded with the biopolymer through interaction with TiO<sub>2</sub>, we firstly calculated the total number of titania nanoparticles, which was added to the cellulose nanofibers, by following formula:

$$N_{total} = m_{total}/m_p$$

where  $m_{total}$  – total mass of TiO<sub>2</sub> particles (g),  $m_p$  – mass of the single TiO<sub>2</sub> particle (g).

The total surface area of titania nanoparticles grafted onto cellulose nanofibers can be estimated as follows:

$$S_{total} = N_{total} \cdot S_p$$

where  $N_{total}$  – total number of titania nanoparticles,  $S_p$  - surface of the single TiO<sub>2</sub> particle (nm<sup>2</sup>). Then, the amount of drug  $n$  (mol) can be found as follows:

$$n = S_{total} \cdot N_A / S$$

where  $S$  – area of functional group (nm<sup>2</sup>) and  $N_A$  is Avogadro number. The approximate area of 0.24 nm<sup>2</sup> per phosphonate group is commonly proposed in literature<sup>1</sup> and utilized by us in our previous papers<sup>2,3</sup>.

**Table S1** Antimicrobial activity of samples against *S.aureus* and *E.coli*. The means (mm)  $\pm$  standard deviation for at least three replicates are illustrated. (\*na = no activity)

| Sample                        | <i>S.aureus</i>                             |                      | <i>E.coli</i>                               |                      |
|-------------------------------|---------------------------------------------|----------------------|---------------------------------------------|----------------------|
|                               | Concentration ( $\mu\text{g}/\text{disk}$ ) | Inhibition zone (mm) | Concentration ( $\mu\text{g}/\text{disk}$ ) | Inhibition zone (mm) |
| CNF_TC_M0                     | 1                                           | 23.5 $\pm$ 2.9       | 1                                           | 14.5 $\pm$ 1.7       |
|                               | 10                                          | 30.5 $\pm$ 0.6       | 10                                          | 22.0 $\pm$ 0.8       |
|                               | 50                                          | 34.0 $\pm$ 1.8       | 50                                          | 27.3 $\pm$ 1.7       |
|                               | 100                                         | 38.3 $\pm$ 2.6       | 100                                         | 32.8 $\pm$ 2.2       |
| CNF_TiO <sub>2</sub> _TC_M1   | 1                                           | 19.3 $\pm$ 3.4       | 1                                           | 9.3 $\pm$ 2.1        |
|                               | 10                                          | 25.8 $\pm$ 3.7       | 10                                          | 16.3 $\pm$ 0.5       |
|                               | 50                                          | 32.5 $\pm$ 4.7       | 50                                          | 21.0 $\pm$ 1.4       |
|                               | 100                                         | 32.3 $\pm$ 4.4       | 100                                         | 23.3 $\pm$ 0.5       |
| CNF_Phos_M0                   | 10                                          | 28.5 $\pm$ 3.2       | 50                                          | 25.0 $\pm$ 0.0       |
|                               | 50                                          | 42.0 $\pm$ 7.2       |                                             |                      |
|                               | 100                                         | 45.8 $\pm$ 5.5       | 100                                         | 29.0 $\pm$ 2.8       |
| CNF_TiO <sub>2</sub> _Phos_M2 | 10                                          | na*                  | 50                                          | na                   |
|                               | 50                                          | na                   |                                             |                      |
|                               | 100                                         | na                   | 100                                         | na                   |

**Table S2** The antimicrobial effect of samples against *S.aureus* obtained from the liquid broth assay

| Sample                        | Concentration ( $\mu\text{g}/\text{ml}$ ) | Time delay (h) | Growth inhibition (%) |
|-------------------------------|-------------------------------------------|----------------|-----------------------|
| CNF_TC_M0                     | 1                                         | 0              | 100                   |
| CNF_TiO <sub>2</sub> _TC_M1   | 1                                         | 0              | 100                   |
| CNF_Phos_M0                   | 100                                       | 0              | 100                   |
| CNF_TiO <sub>2</sub> _Phos_M2 | 100                                       | 0*             | 100                   |
|                               |                                           | 0              | 96.6                  |
|                               |                                           | 12             | 99.2                  |
|                               |                                           | 18             | 98.1                  |
|                               |                                           | 24             | 96.6                  |

(\*) with addition of citrate buffer (pH=6,0.03M)

Figure FS1 FTIR of the CNF\_TiO<sub>2</sub>\_Phos\_M2 compared to CNF\_TiO<sub>2</sub> and PCNF.

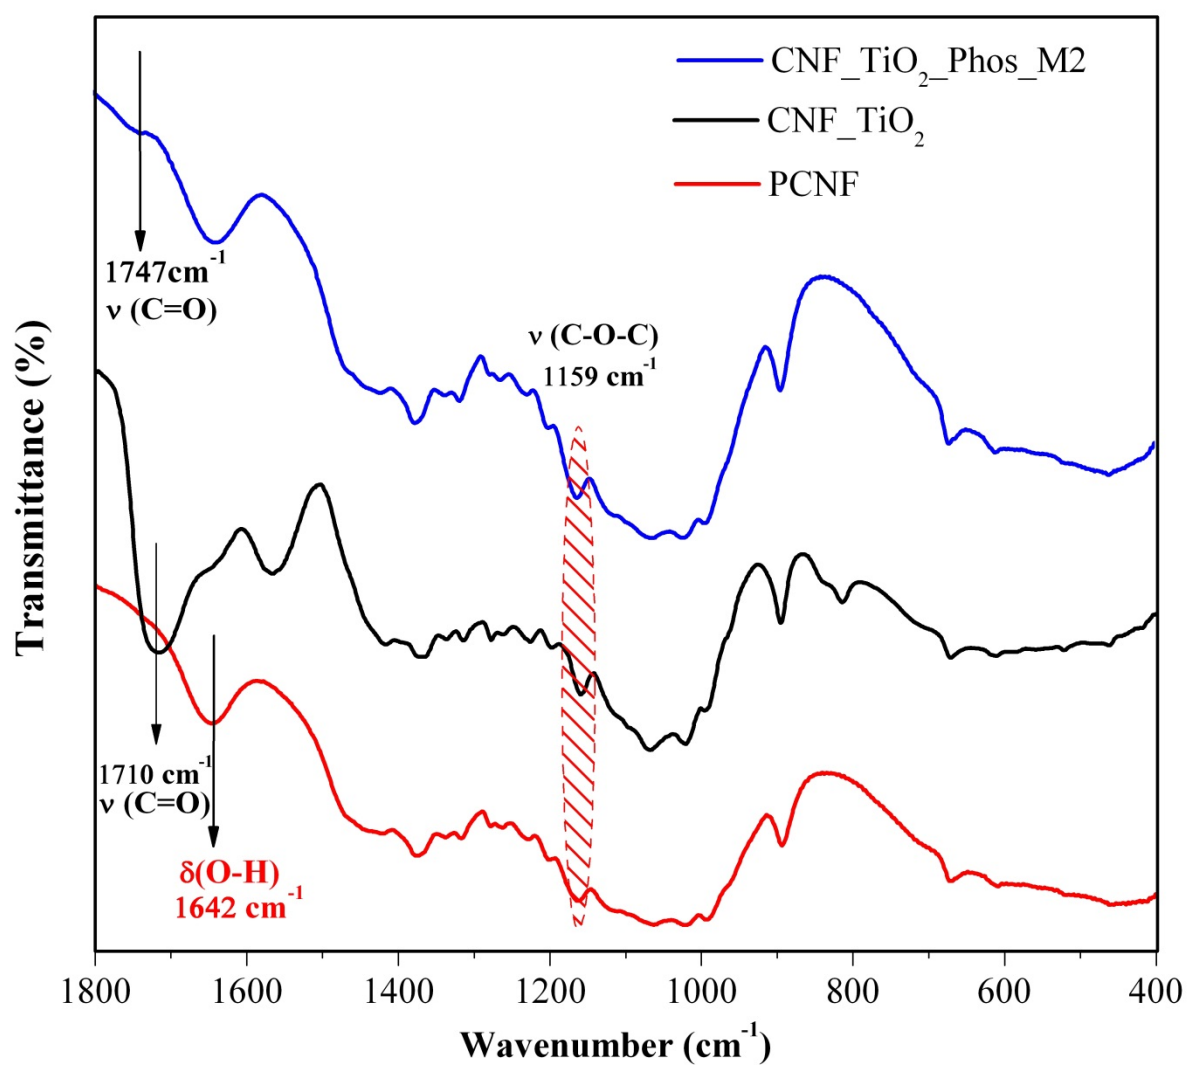

**Figure FS2** UV-Vis spectrum of the CNF\_TiO<sub>2</sub>\_Phos\_M2 material in the form of thin transparent film.

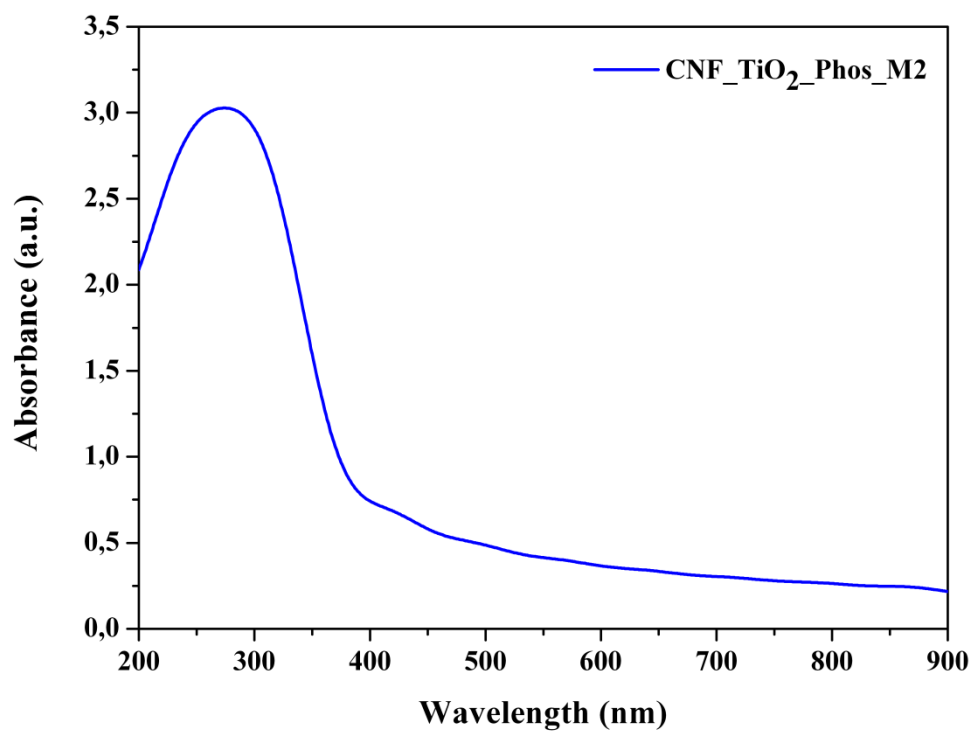

**Figure FS3** High resolution TEM view of the applied TiO<sub>2</sub> nanoparticles (reprinted with permission from Angew. Chem. Int. Ed. 2008, 47, 8506 –8509)

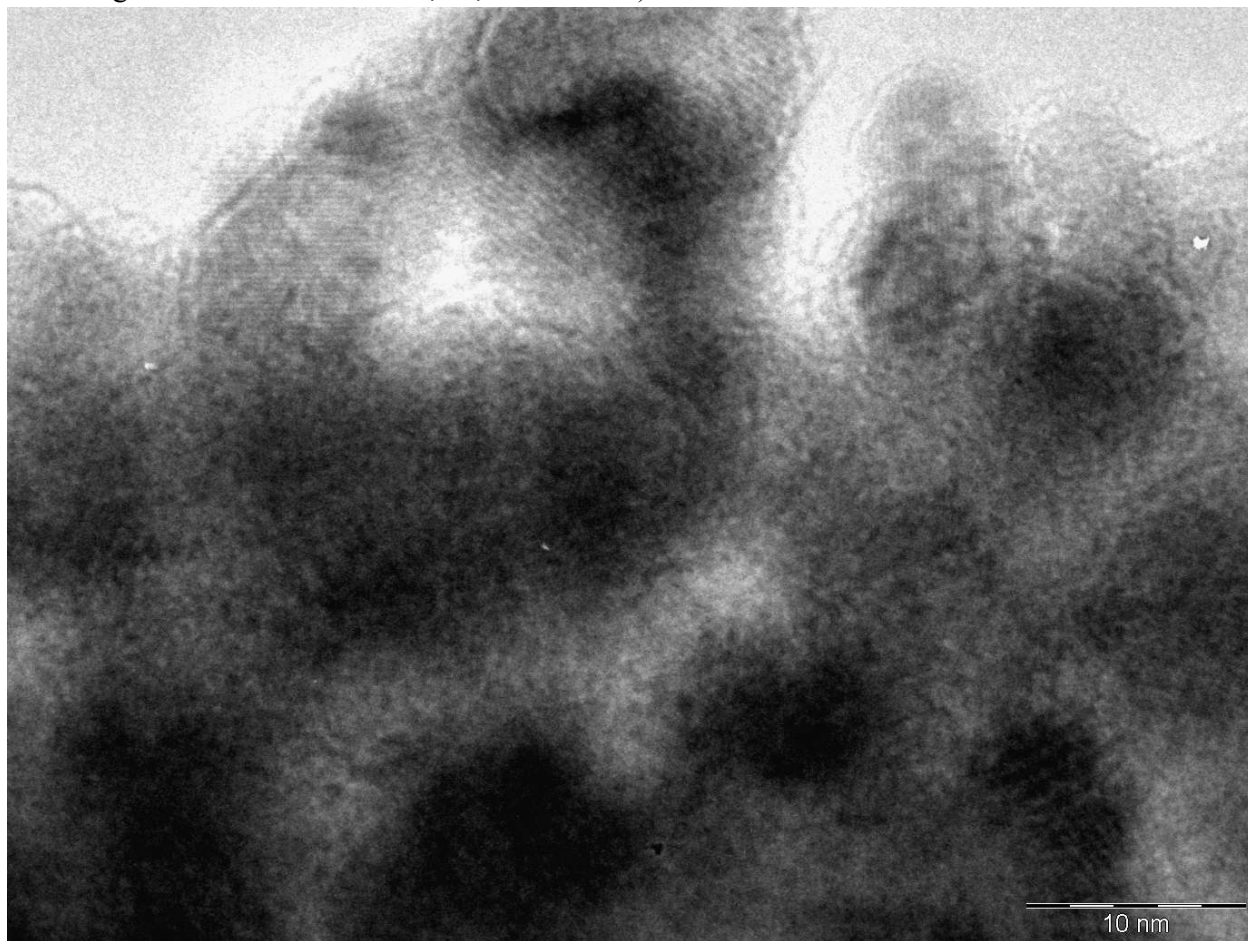

**Figure FS4** The stability demonstration for solutions of Rhodamine B in the presence of the applied TiO<sub>2</sub> nanoparticles (reprinted with permission from the supplementary materials to Angew. Chem. Int. Ed. 2008, 47, 8506 –8509)

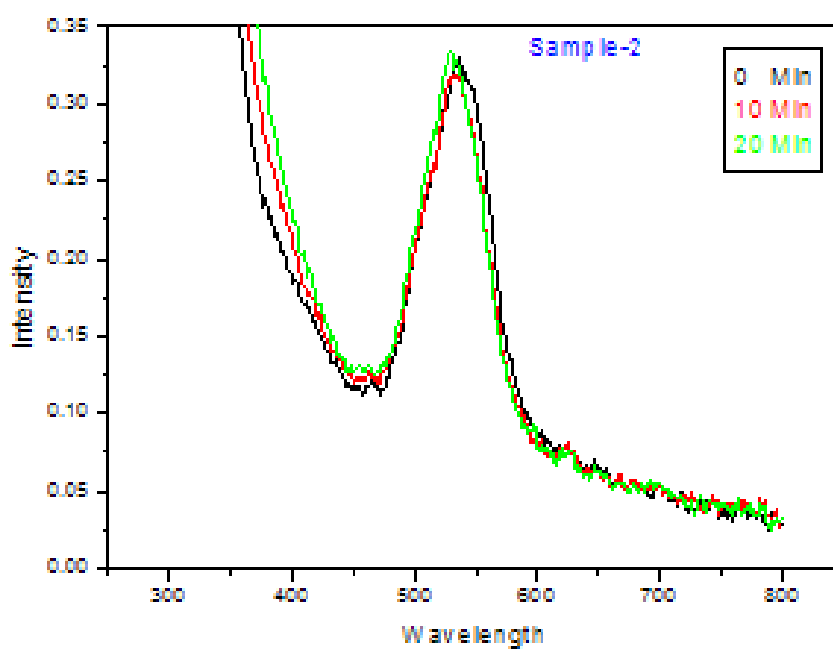

## References

1. C. W. Beier, M. A. Cuevas, R. L. Brutchey, *Langmuir*, 2009, 26, 5067.
2. R. Pazik, R. Tekoriute, S. Håkanson, G.A. Seisenbaeva, R. Wiglusz, W. Streck, Y.K. Gun'ko, Kessler V.G., *Chem. Eur. J.*, 2009, 15, 6820
3. R. Pazik, R. Andersson, L. Kepinski, J.M. Nedelec, V. G. Kessler, G. A. Seisenbaeva, *J. Phys. Chem. C*, 2011, 115, 9850.
